Title: Health-Related Quality of Life Among Critical Ill Patients After Move Out of ICU - A Systematic Review Protocol

Yao Li,<sup>1</sup> Dan Fang,<sup>2</sup> Qiao Wu,<sup>3</sup>

1. Department of Intensive care unit Chengdu Fifth People's Hospital, Chengdu, Sichuan, People's Republic of China, [kittylee8989@gmail.com](mailto:kittylee8989@gmail.com)
2. Department of Intensive care unit Chengdu Fifth People's Hospital Chengdu, Sichuan, People's Republic of China, [katesistery@qq.com](mailto:katesistery@qq.com)
3. Orthopedics Department, Sichuan Academic of Medical Science, Sichuan Provincial People's Hospital, Chengdu, Sichuan, People's Republic of China, [631163587@qq.com](mailto:631163587@qq.com)

Corresponding: Yao Li

Department of Intensive care unit Chengdu Fifth People's Hospital Chengdu, 611130, Sichuan, Republic of China. [yao\\_li@cmu.ac.th](mailto:yao_li@cmu.ac.th)

**Word counts:** 1526

**Keywords:** HRQOL, Critical illness, Intensive care

**Data statements:** no additional data is available

**Abstract:**

**Introduction:** the impact of critical illness is profound on patients resulting in physical, mental and social consequences and a poor health-related quality of life (HRQOL). Several studies investigated HRQOL among patients after moving out of the Intensive care unit (ICU). We will propose a systematic review of these studies.

**Method:** We will search PubMed, Web of Science, EMBASE, CINAHL (Cumulative

**NOTE:** This preprint reports new research that has not been certified by peer review and should not be used to guide clinical practice.

Index to Nursing and Allied Health Literature), Cochrane Library and open grey paper that reported HRQOL of ICU survivors from January 2012 to January 2022 in the English language. We will extract HRQOL data. Risk of bias will use the QUADAS-2 tool. The strength of results depends on the quality of studies.

### **Strengths and limitations of this study:**

This study will focus on general ICU survivors and make sure our results are generalizable

The information about HRQOL is updated, and the follow-up period was extended. We will focus on recently ten-year studies. We will be glad to see whether the HRQOL improved.

This study will analyze the factors associated with HRQOL after patients moved out of ICU.

This study will not perform a meta-analysis due to the heterogeneous population.

**Ethics and dissemination:** We do not require ethical approval because our review will be based on published material.

**Trial registration number:** PROSPERO CRD 42022304279

## **INTRODUCTION**

### **Rationale:**

With improved intensive care medicine, most critically ill patients can survive

critical conditions and move out of the Intensive care unit (ICU). According to Society of vital care medicine statistics, over five million patients are admitted to ICU annually in the USA, and over 80% of patients could be discharged from the ICU (SCCM, 2020). Meanwhile, these patients were called ICU survivors. They benefited from advanced intensive care while suffering the sequela of critical illness. Over half of ICU survivors suffered different degrees of physical, mental, and cognitive impairments called post-ICU syndrome (PICS) and poor HRQOL after discharge from ICU (2,3). HRQOL was a perception of the life of patients affected by critical illness and ICU experience (4). ICU survivors needed to reflect on functioning outcomes from patients' perspectives. Poor HRQOL among ICU survivors becomes a significant concern linked with higher mortality, financial burdens, and family caregivers' burdens (5–7). In the past tens of years, poor HRQOL among ICU survivors addressed attention from researchers, which led to an increasing number of HRQOL research. Thus, we will conduct a systematic review to analyze and summarise the results.

We will use the valid instrument SF 36 to measure HRQOL. Due to the heterogeneity of ICU survivors, generic instruments such as SF family tools include SF36, SF 12, SF 20 and EQ-5D. However, only SF 36 had dimensions scores that reflect HRQOL comprehensively. Therefore, this study analyses the results that used valid interments of SF 36 (version 1 and version 2). This review will review the existing literature on HRQOL in SF 36 instrument after patients moved out of ICU and the measurement time. We also measured HRQOL compared to the general population, which explains HRQOL changes with time following ICU discharge. We will identify

factors associated with HRQOL. We are interested in determining the length of follow-up and how many patients are lost to follow-up. We will provide comprehensive and detailed descriptive information for future reference in long-term outcome research for general ICU survivors.

## **Objective**

In this study, our primary objective is to explore HRQOL among patients discharged from ICU compared with the general population. Our second outcome is to examine the change of HRQOL with time and examine factors that affected HRQOL in studies and follow-up duration.

## **Methods**

This protocol followed (PRISMA-P) guidelines. We will conduct a systematic review of literature on HRQOL among patients discharged from ICU. The language is English.

## **Information sources:**

we searched PubMed, Web of Science, EMBASE, Cochrane Library, CINAHL, and open grey paper that reported HRQOL of ICU survivors from January 2012 to January 2022 in English.

## **Search strategy**

Our search strategy is (“critically ill patients” OR “critical ill survivor” OR “ICU patients” OR “ICU survivor”) AND (“Health-related quality of life” OR “quality of life”

OR “HRQOL” OR “QOL” OR “long-term outcome”). We reviewed the reference list of primary studies included in the review and the reference lists of relevant, previously published reviews. We also investigated why the initial search strategy had not been discovered. A new 'key phrase' will be used if it is necessary.

### **Eligible criteria:**

From 2011 to 2021, we will look at prospective cohort studies, retrospective cohort studies, and cross-sectional studies published in English.

In a diagram adapted from the PRISMA guidelines, the inclusion of studies in each stage of the systematic review will be shown (8)

### **Report inclusion criteria:**

- (1) Adult ICU survivors: age over 18
- (2) Original research
- (3) Quality of life assessed at least discharge for ICU three months
- (4) Measurement and reporting of specific QOL domains at baseline and follow-up.
- (5) Compared with the age-adjusted population
- (6) General ICU settings (medical/surgical/mixed)
- (7) Valid measurement SF 36 (Version one / version two)
- (8) English language

### **Exclude criteria**

- (1) Only investigated precisely procedure or event, for example, post-cardiac arrest, COVID -19, ECOM patients
- (2) Specific age population, For instance, age over 65
- (3) Only in particular diseases or one disease, For example, trauma.
- (4) Experimental studies without a control group.
- (5) We would choose a study with the longest follow-up time if the studies reported the same patients.

### **Data management:**

we will store identified citations and electronic text to store a reference manager programme.

### **Selection process:**

After the search, two reviewers will independently screen the titles and abstracts that identify potential studies. The process will follow Prisma-P guideline 2020 (figure 1). Two researchers will remove abstracts that do not match the eligibility criteria. If there is no consensus, we will have a discussion. If necessary, the third researcher was consulted to make the final decision.

Two researchers will independently carry out a final screening process of the full-text articles to select articles that reach our eligibility criteria. Again, we will record the

reason for the exclusion. The inclusion of papers in each stage of the systematic review will be shown in a diagram adapted from the PRISMA statement(8)

### **Data extraction**

Two review authors will extract data from the full-text article and online supplementary data and will be performed as a data extraction table. It will not be included if a consensus of studies cannot be reached. In case of unclear information, we will contact the authors and exclude ambiguous data if this is unsuccessful in reaching the author.

We will extract the following information:

1. Citation
2. Study country of origin
2. Study design
3. Year of publication
4. Type of ICU
5. Patient type: general/sepsis/respiratory.
6. The number of patients was screened.
7. The total number of patients who were alive at the start of the study.
8. Successful Follow-up rate
9. Follow-up time points

10. Proxy ICU HRQOL assess
11. Data on HRQOL gleaned from studies and online resources
12. HRQOL relative to the age-adjusted average population
13. Previous health/pre-existing disease
14. The trend in HRQOL post-discharge.
15. Factors affecting HRQOL in post-discharge

### **Synthesis of data and data analysis**

We will describe ICU survivors' health-related quality of life and subgroups (sepsis, pulmonary, general) (tabular). We will describe secondary outcomes (factors that affect HRQOL, length follow-up in tabular or graphical form.

### **Bias assessment:**

We will set the papers for applicability and bias using the QUADAS-2 tool (9). Due to the heterogeneity of study designs, we have no plans to conduct a meta-analysis of the study findings or assess meta-biases statistically.

### **Assessment of the strength of the conclusion**

The quality of studies determines the strength of the conclusion.

Indeed, previous four studies had conducted HRQOL research. However, most studies retained the studies for 20 years that cannot accurately reflect HRQOL change among ICU survivors (Dowdy et al., 2005; Elliott, 1999; Gerth et al., 2019; Oeyen et



al., 2010). Meanwhile, previous system reviews mostly retained studies in developed countries (10,13,14). In recent years, poor HRQOL among ICUs addressed much more attention in developed countries (15,16). Thus, previous studies could not reflect HRQOL among ICU survivors comprehensively. Elliott and colleagues 1999 reviewed 31 studies, but fewer studies used valid instruments (11). Dowdy et al. (2005) reexamined 21 studies that included 7320 patients and found ICU survivors suffered poor HRQOL; meanwhile, age and severity of illness were the associated factors. Oeyen et al. (2010) retained 53 studies that found that HRQOL was not ideal compared with the norm population. The impact factors of HRQOL were severity of illness, comorbidity, age, and gender. However, they retained studies on specific diseases or events such as cardiac arrest and acute pancreatitis. A newly published systematic review from Gerth et al. (2019) included 48 studies from 2000 to 2015. They found that ICU survivors had poor HRQOL compared to the sex-matched population and improved with time. The most extended follow-up duration was 60 months. However, they did not analyze what factors affect HRQOL (Gerth et al., 2019). With increased awareness of the long-term outcome of ICU, Haug and colleagues conducted a systematic review in a subgroup of Sepsis, major trauma, and severe burn injury. They found that HRQOL among these groups showed similarities to HRQOL.

Nevertheless, it may be less generalizable to represent general ICU survivors' health status (17). This research will concentrate on the foundations of previous research. We looked at studies from the last ten years. Rather than focusing on specific events, we aimed for general ICU admission. Studies that used reliable instruments will be kept.

We will look at the factors that influence HRQOL. To date, the follow-up duration has been extended. We would like to see whether the HRQOL would improve with time.

**Author Contributions:** Yao Li designed a systematic review and wrote this protocol.

Dan Fang and Qiao Wu screened articles, extracted data, assessed bias and processed data independently. During the study, any disagreement will be arbitrated by Yao Li.

All authors agree with the publication of this protocol.

The authors have no conflict of interest.

**Funding:** no funding

**Acknowledgements:** None

**Conflict interests** None declared.

**Reference:**

1. Society of Critical Care Medicine (SCCM). SCCM | Critical Care Statistics [Internet]. Society of Critical Care Medicine (SCCM). 2020 [cited 2021 Sep 26]. Available from: <https://sccm.org/Communications/Critical-Care-Statistics>
2. Mikkelsen ME, Still M, Anderson BJ, Bienvenu OJ, Brodsky MB, Brummel N, et al. Society of Critical Care Medicine's International Consensus Conference on Prediction and Identification of Long-Term Impairments After Critical Illness. *Critical Care Medicine*. 2020 Nov;48(11):1670–9.
3. Myers EA, Smith DA, Allen SR, Kaplan LJ. Post-ICU syndrome: rescuing the

- undiagnosed. *Journal of the American Academy of Physician Assistants*. 2016 Apr;29(4):34–7.
4. Wilson IB, Cleary PD. Linking Clinical Variables With Health-Related Quality of Life: A Conceptual Model of Patient Outcomes. *JAMA*. 1995 Jan 4;273(1):59.
  5. Beesley SJ, Hirshberg EL, Wilson EL, Butler JM, Oniki TA, Kuttler KG, et al. Depression and Change in Caregiver Burden Among Family Members of Intensive Care Unit Survivors. *Am J Crit Care*. 2020 Sep 1;29(5):350–7.
  6. Daniels LM, Johnson AB, Cornelius PJ, Bowron C, Lehnertz A, Moore M, et al. Improving quality of life in patients at risk for post-intensive care syndrome. *Mayo Clin Proc Innov Qual Outcomes*. 2018 Nov 26;2(4):359–69.
  7. van Beusekom I, Bakhshi-Raiez F, de Keizer NF, Dongelmans DA, van der Schaaf M. Reported burden on informal caregivers of ICU survivors: a literature review. *Crit Care*. 2016 Jan 21;20:16.
  8. Page MJ, McKenzie JE, Bossuyt PM, Boutron I, Hoffmann TC, Mulrow CD, et al. The PRISMA 2020 statement: an updated guideline for reporting systematic reviews. *BMJ*. 2021 Mar 29;n71.
  9. Whiting PF. QUADAS-2: A Revised Tool for the Quality Assessment of Diagnostic Accuracy Studies. *Ann Intern Med*. 2011 Oct 18;155(8):529.
  10. Dowdy DW, Eid MP, Sedrakyan A, Mendez-Tellez PA, Pronovost PJ, Herridge

- MS, et al. Quality of life in adult survivors of critical illness: A systematic review of the literature. *Intensive Care Med.* 2005 May 1;31(5):611–20.
11. Elliott D. Measuring the health outcomes of general ICU patients: a systematic review of methods and findings. *Australian Critical Care.* 1999 Dec;12(4):132–40.
  12. Gerth AMJ, Watkinson PJ, Young JD. Changes in health-related quality of life (HRQoL) after discharge from intensive care unit: a protocol for a systematic review. *BMJ Open.* 2015 Nov 24;5(11):e009508.
  13. Oeyen, Sandra SG, Vandijck DM, Benoit DD, Annemans L, Decruyenaere JM. Quality of life after intensive care: A systematic review of the literature: *Critical Care Medicine.* 2010 Dec;38(12):2386–400.
  14. Gerth AMJ, Hatch RA, Young JD, Watkinson PJ. Changes in health-related quality of life after discharge from an intensive care unit: a systematic review. *Anaesthesia.* 2019 Jan;74(1):100–8.
  15. Rai R, Singh R, Azim A, Agarwal A, Mishra P, K Singh KS. Impact of critical illness on quality of life after intensive care unit discharge. *Indian Journal of Critical Care Medicine.* 2020 May;24(5):299–306.
  16. Zeggwagh AA, Dendane T, Abidi K, Kettani MN, Iraqi A, Zeggwagh Z. Health-related quality of life evaluated by MOS SF-36 in the elderly patients 1 month before ICU admission and 3 Months after ICU Discharge. *Indian Journal of*

Critical Care Medicine. 2020 Sep 5;24(7):531–8.

17. Haug VF, Tapking C, Panayi AC, Thiele P, Wang AT, Obed D, et al. Long-term sequelae of critical illness in sepsis, trauma and burns: A systematic review and meta-analysis. *Journal of Trauma and Acute Care Surgery*. 2021 Oct;91(4):736–47.

Figure one: The selection flow diagram, adapted from PRISMA statement 2020 (8).

Figure 1: Diagram Flow adopted from PRISMA statement 2020

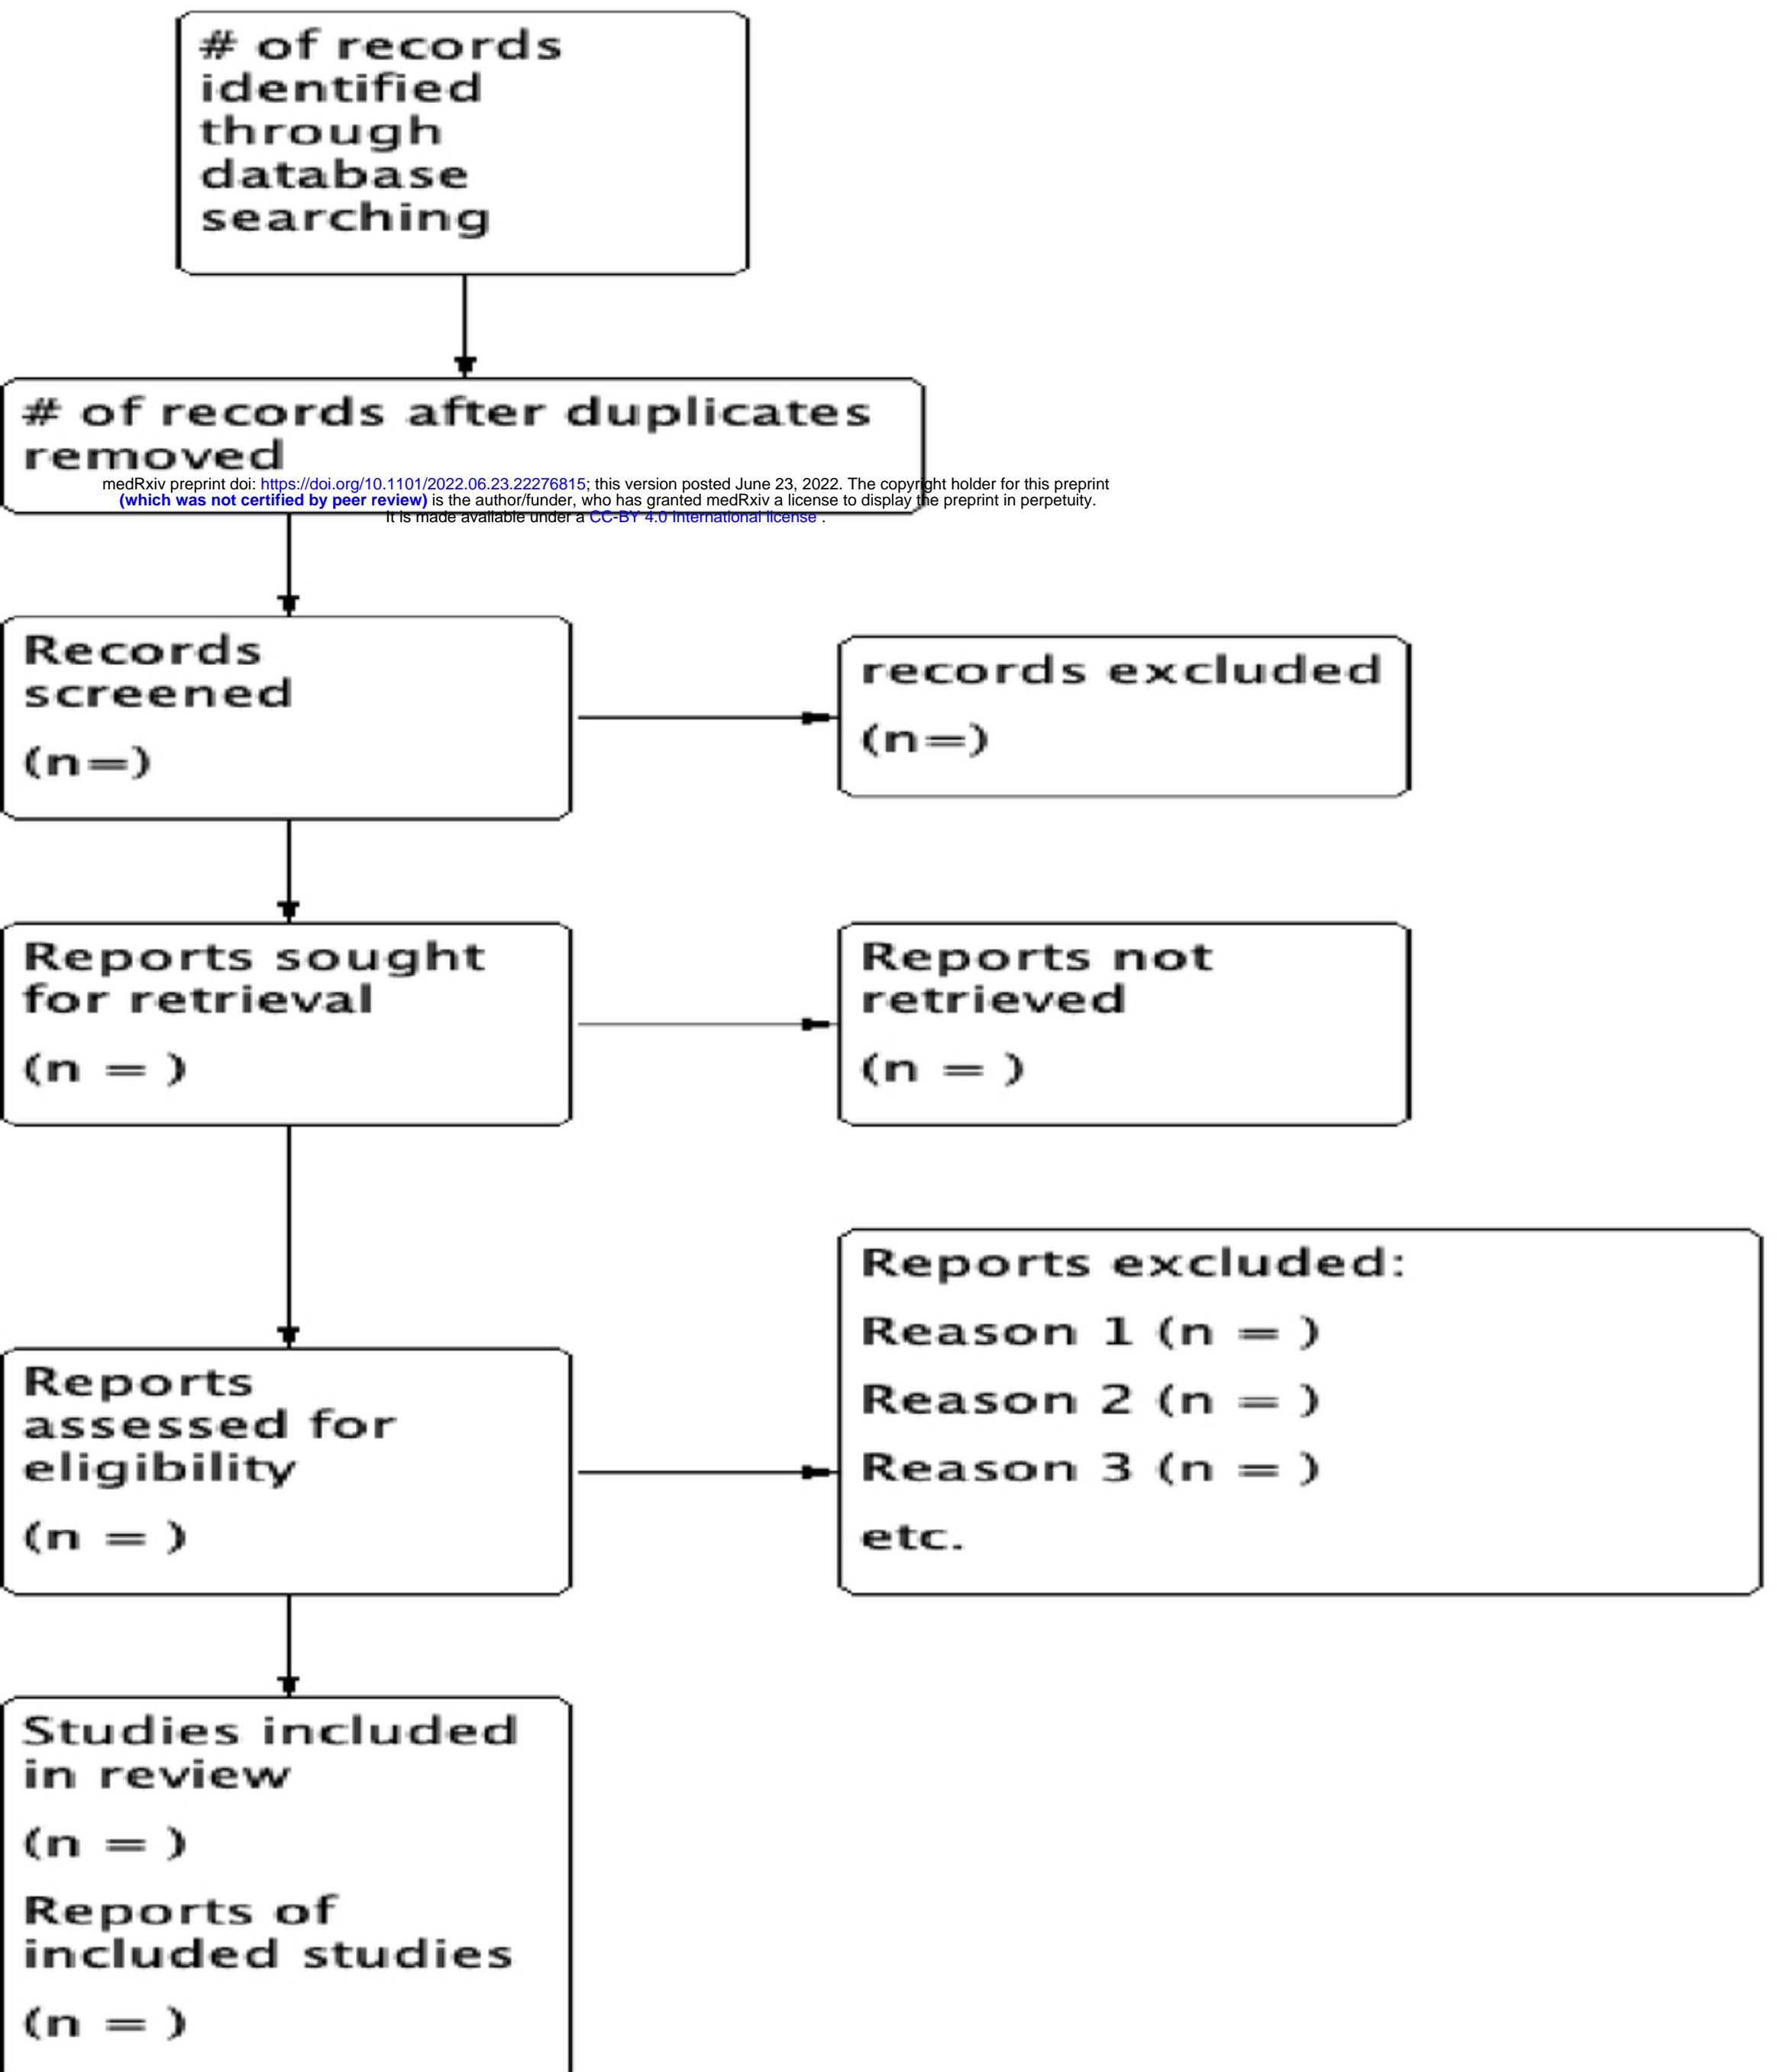

Figure
